# Supplementary material for: Antifouling Effects of Superhydrophobic Coating on Sessile Marine Invertebrates
Source: MDPI journal article supplement (doi:10.3390/ijerph19137973), 2022-06-29
Supplement: s1 [file s1]

## **Supplementary Information**

### **Antifouling Effects of Superhydrophobic Coating on Sessile Marine Invertebrates**

Seongjun Bae <sup>1,2,†</sup>, Ye Ju Lee <sup>3,†</sup>, Min Kyung Kim <sup>4</sup>, Yeongwon Kwak <sup>5</sup>, Chang-Ho Choi <sup>5</sup>, and Dong Gun Kim <sup>6,\*</sup>

<sup>1</sup>Department of Ecology and Conservation, Marine Biodiversity Institute of Korea, Seochon 33662, Republic of Korea

<sup>2</sup>Department of Ocean Environmental Sciences, College of Natural Science, Chungnam National University, Daejeon 34134, Republic of Korea

<sup>3</sup>Institute of Environmental Ecology, Sahmyook University, Seoul 01795, Republic of Korea

<sup>4</sup>Department of Bio & Environment Technology, Seoul Women's University, Seoul 01797, Republic of Korea

<sup>5</sup>Department of Chemical Engineering, Gyeongsang National University, Jinju 52828, Republic of Korea

<sup>6</sup>Smith Liberal Arts College, Sahmyook University, Seoul 01795, Republic of Korea

<sup>†</sup>Seongjun Bae and Ye Ju Lee contributed equally to this work.

\*Correspondence to: Dong Gun Kim (ecology@syu.ac.kr)

**Supplementary Information includes  
Figure S1  
Tables S1 and S2**

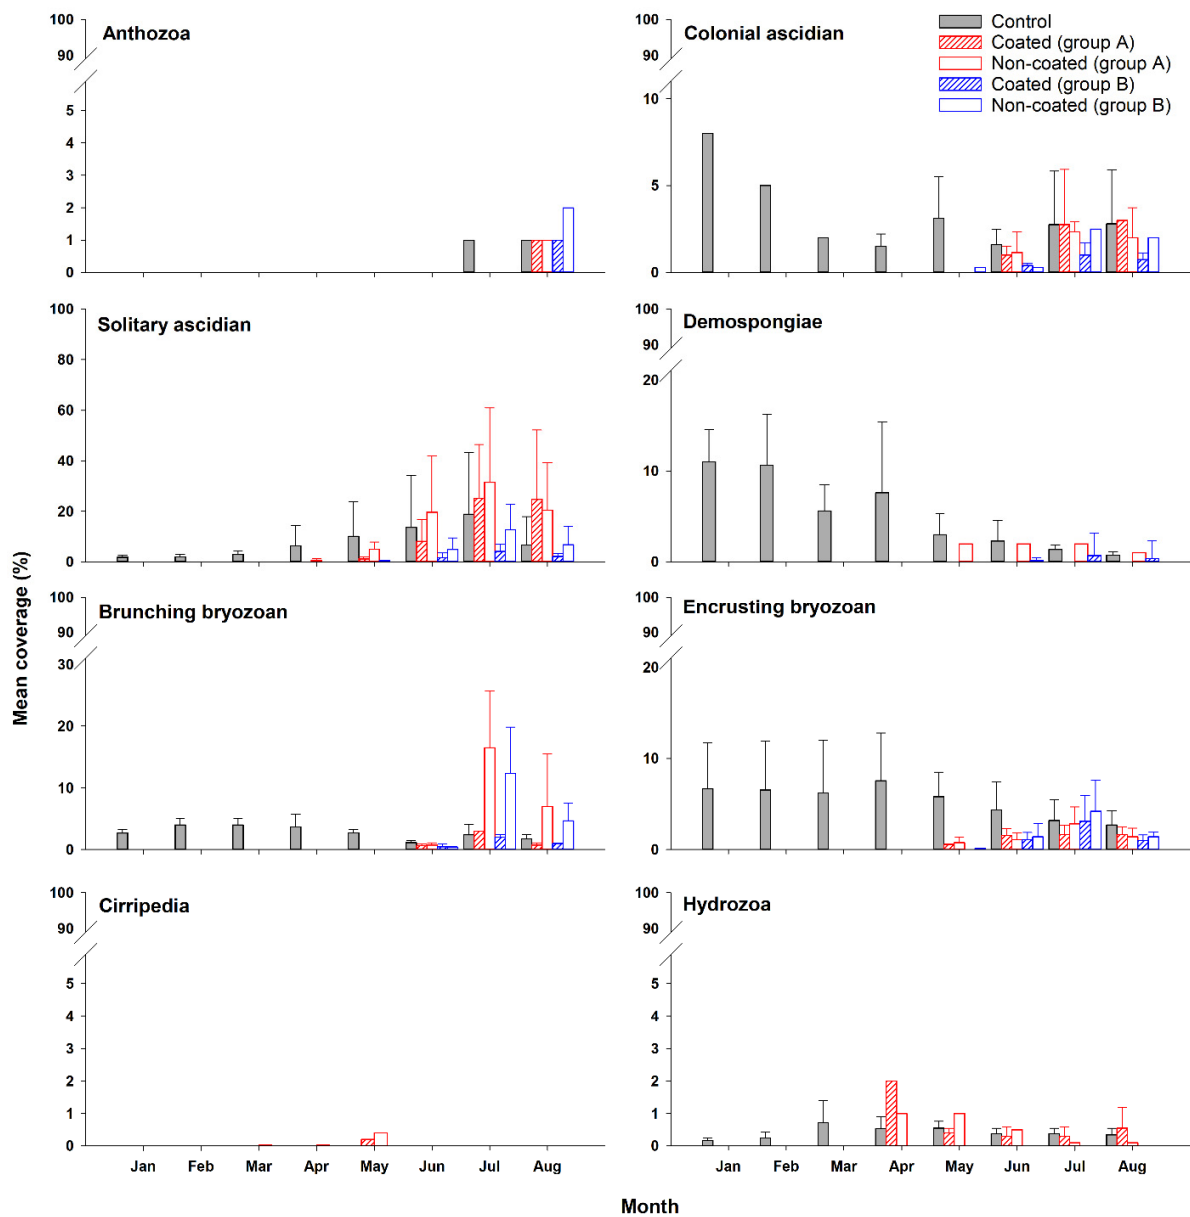

Figure S1. Mean coverage of each taxon observed during the study period.

(a) Group A

Coated

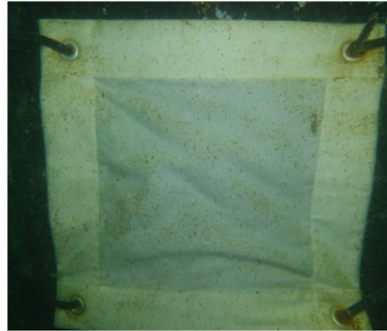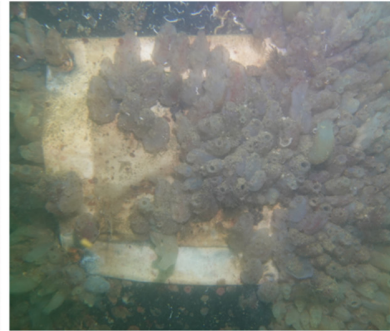

Non-coated

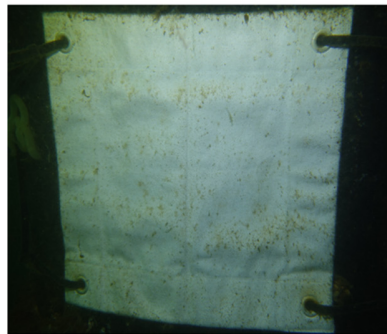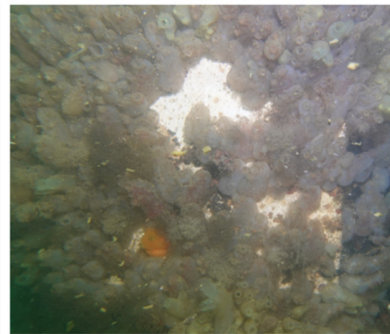

(b) Group B

Coated

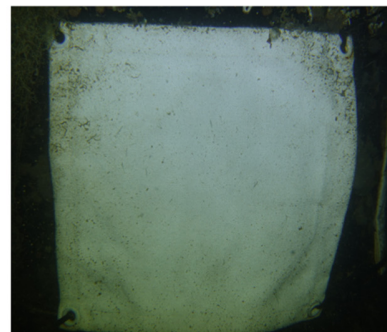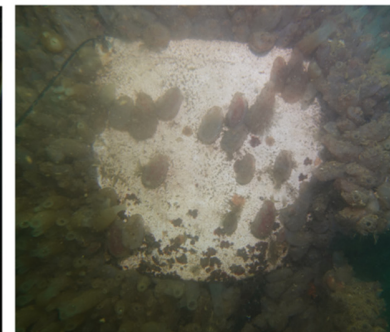

Non-coated

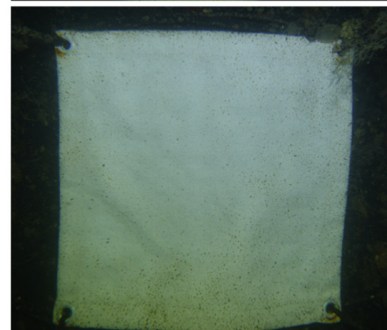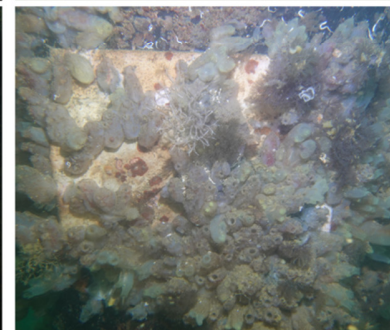

Figure S2. A photograph of the colonization process of benthic invertebrates attached to the substrate. After substrate installation, one month and seven months in group A (a), and one month and four months in group B (b).

Table S1. Species lists for the ascidian and bryozoan groups.

| Taxon group  | Ascidian group             |                               | Bryozoan group                  |                                |
|--------------|----------------------------|-------------------------------|---------------------------------|--------------------------------|
|              | Solitary                   | Colonial                      | Branching                       | Encrusting                     |
| Species list | <i>Asidiella aspersa</i>   | <i>Botrylloides violaceus</i> | <i>Bugula neritina</i>          | <i>Schizoporella unicornis</i> |
|              | <i>Ciona robusta</i>       | <i>Didemnum vexillum</i>      | <i>Tricellaria occidentalis</i> | <i>Watersipora subtorquata</i> |
|              | <i>Ciona savignyi</i>      | <i>Botryllus schlosseri</i>   |                                 |                                |
|              | <i>Halocynthia roretzi</i> |                               |                                 |                                |
|              | <i>Styela clava</i>        |                               |                                 |                                |

Table S2. List of sessile marine invertebrates observed at survey sites during the study period. Asterisks indicate rare species (i.e., those occurring at a frequency of < 5 %) excluded from the analysis. Open circles indicate species observed in each group.

| Taxa                                          | Group | Control | A | B |
|-----------------------------------------------|-------|---------|---|---|
| Phylum Porifera                               |       |         |   |   |
| Class Demospongiae                            |       |         |   |   |
| Order Suberitida                              |       |         |   |   |
| Family Halichondriidae                        |       |         |   |   |
| <i>Halichondria (Halichondria) bowerbanki</i> |       | ○       | ○ |   |
| Phylum Cnidaria                               |       |         |   |   |
| Class Hydrozoa                                |       |         |   |   |
| Order Anthoathecata                           |       |         |   |   |
| Family Tubulariidae                           |       |         |   |   |
| <i>Tubularia mesembryanthemum</i>             |       | ○       | ○ |   |
| Order Leptothecata                            |       |         |   |   |
| Family Campanulariidae                        |       |         |   |   |
| <i>Obelia dichotoma</i>                       |       | ○       |   |   |
| Class Anthozoa                                |       |         |   |   |
| Order Actiniaria                              |       |         |   |   |
| Family Actiniidae                             |       |         |   |   |
| <i>Anthopleura anjunae</i>                    |       | ○       | ○ | ○ |
| Phylum Mollusca                               |       |         |   |   |
| Class Bivalvia                                |       |         |   |   |
| Order Mytilida                                |       |         |   |   |
| Family Mytilidae                              |       |         |   |   |
| <i>Mytilus galloprovincialis</i>              |       | ○       |   |   |
| Order Ostreida                                |       |         |   |   |
| Family Ostreidae                              |       |         |   |   |
| <i>Magallana gigas</i>                        |       | ○       |   |   |
| Order Pectinida                               |       |         |   |   |
| Family Anomiidae                              |       |         |   |   |
| <i>Pododesmus macroschisma</i> *              |       | ○       |   |   |
| Phylum Arthropoda                             |       |         |   |   |
| Class Hexanauplia                             |       |         |   |   |
| Order Sessilia                                |       |         |   |   |
| Family Balanidae                              |       |         |   |   |
| <i>Balanus trigonus</i>                       |       | ○       | ○ |   |
| <i>Fistulobalanus albicostatus</i>            |       | ○       |   |   |
| Phylum Cnidaria                               |       |         |   |   |
| Class Anthozoa                                |       |         |   |   |
| Order Actiniaria                              |       |         |   |   |
| Family Actiniidae                             |       |         |   |   |
| <i>Anthopleura anjunae</i> *                  |       | ○       | ○ | ○ |
| Phylum Bryozoa                                |       |         |   |   |
| Class Gymnolaemata                            |       |         |   |   |
| Order Cheilostomata                           |       |         |   |   |
| Family Schizoporellidae                       |       |         |   |   |
| <i>Schizoporella unicornis</i>                |       | ○       | ○ | ○ |

Table S2. Continued

| Taxa                              | Group | Control | A | B |
|-----------------------------------|-------|---------|---|---|
| Phylum Bryozoa                    |       |         |   |   |
| Class Gymnolaemata                |       |         |   |   |
| Order Cheilostomatida             |       |         |   |   |
| Family Bugulidae                  |       |         |   |   |
| <i>Bugula neritina</i>            |       | ○       | ○ | ○ |
| Family Candidae                   |       |         |   |   |
| <i>Tricellaria occidentalis</i> * |       | ○       | ○ | ○ |
| Family Watersiporidae             |       |         |   |   |
| <i>Watersipora subtorquata</i>    |       | ○       | ○ | ○ |
| Phylum Chordata                   |       |         |   |   |
| Class Ascidiacea                  |       |         |   |   |
| Order Aplousobranchia             |       |         |   |   |
| Family Didemnidae                 |       |         |   |   |
| <i>Didemnum vexillum</i>          |       | ○       |   |   |
| Order Phlebobranchia              |       |         |   |   |
| Family Ascidiidae                 |       |         |   |   |
| <i>Ascidella aspersa</i>          |       | ○       | ○ | ○ |
| Family Cionidae                   |       |         |   |   |
| <i>Ciona robusta</i>              |       | ○       | ○ | ○ |
| <i>Ciona savignyi</i>             |       | ○       |   |   |
| Order Stolidobranchia             |       |         |   |   |
| Family Botryllidae                |       |         |   |   |
| <i>Botrylloides violaceus</i>     |       | ○       | ○ | ○ |
| Family Pyuridae                   |       |         |   |   |
| <i>Halocynthia roretzi</i>        |       | ○       |   |   |
| Family Styelidae                  |       |         |   |   |
| <i>Botryllus schlosseri</i>       |       | ○       | ○ | ○ |
| <i>Styela clava</i>               |       | ○       | ○ | ○ |
| <i>Styela plicata</i> *           |       |         | ○ |   |
